# Supplementary material for: The Apoplastic and Symplastic Antioxidant System in Onion: Response to Long-Term Salt Stress
Source: MDPI journal article supplement (doi:10.3390/antiox9010067), 2020-01-12
Supplement: s1 [file s1]

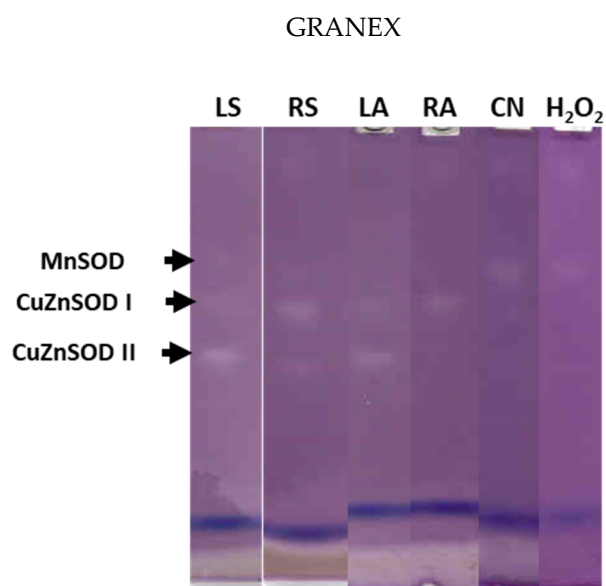

**Figure S1.** SOD isoenzyme identification after native 10% PAGE in symplast and apoplastic fractions from leaf and root of onion 'Granex 429' plants. LS: Leaf symplast; RS: root symplast; LA, leaf apoplast; RA, root apoplast. +CN, incubation in the presence of 2 mM KCN. +H<sub>2</sub>O<sub>2</sub>, incubation in the presence of 5 mM H<sub>2</sub>O<sub>2</sub>. For LS and RS 50 µg of protein was used.
